# Supplementary material for: Fabrication and characterization of superior stable Pickering emulsions stabilized by propylene glycol alginate gliadin nanoparticles
Source: Royal Society of Chemistry journal article supplement (doi:10.1039/d1fo03940g), 2022-01-01
Supplement: d1fo03940g1.pdf [file d1fo03940g1.pdf]

## Supporting Information

### Fabrication and characterization of superior stable Pickering emulsions stabilized by propylene glycol alginate gliadin nanoparticles

Table. S1 Secondary structure content of GPPs with different gliadin/PGA mass ratios

|            | $\alpha$ -helix | $\beta$ -sheet- | $\beta$ -turn | Unordered coil |
|------------|-----------------|-----------------|---------------|----------------|
| GPPs1:0    | 13.8            | 41.6            | 7.9           | 36.7           |
| GPPs1:0.25 | 19.4            | 30.3            | 13.5          | 36.8           |
| GPPs1:0.5  | 22.1            | 26.1            | 13.7          | 38.1           |
| GPPs1:0.75 | 27.8            | 12.1            | 22.7          | 37.4           |
| GPPs1:1    | 28.4            | 8.2             | 25.2          | 38.1           |
| GPPs0:1    | -               | -               | -             | -              |

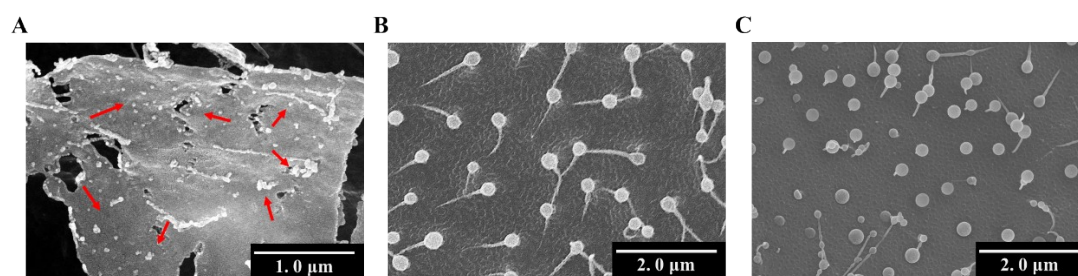

Fig. S 1 Cryo-SEM images of the physical combination of gliadin particles(A),and GPPs with the gliadin/PGA mass ratios of 1:0.05 (B) and 1:0.02 (C). The arrow shows gliadin particles.

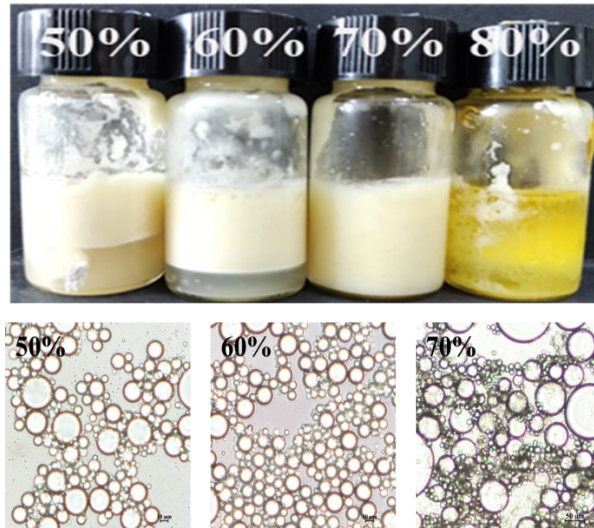

Fig. S 2 Appearance and micrograph of emulsions stabilized by GPPs 1:1 after storage for 6 months.

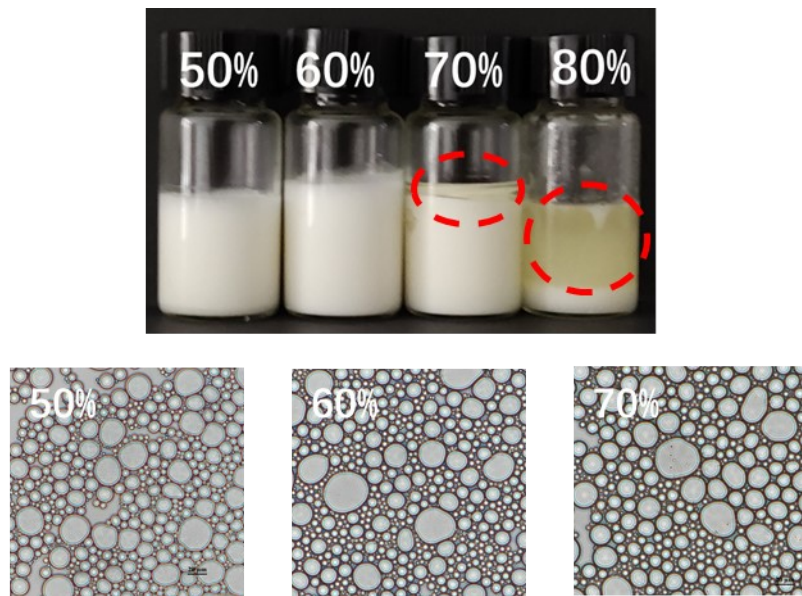

Fig. S 3 Appearance and micrograph of Pickering emulsion co-stabilized by gliadin particles and PGA. The red cycle shows the oil layer.
